# Supplementary material for: Sharing GWAS summary statistics results in more citations
Source: PubMed Central journal article supplement (PMC9884206; doi:10.1038/s42003-023-04497-8), 2023-01-28
Supplement: 42003_2023_4497_MOESM1_ESM.pdf [file 42003_2023_4497_MOESM1_ESM.pdf]

## Description of Additional Supplementary Files

**File name:** Supplementary Data 1

**Description:** Studies and summary statistics datasets included in this study.

**File name:** Supplementary Data 2

**Description:** Analysis of articles published on Nature Genetics or PLoS Genetics without summary data on GWAS catalog.

**File name:** Supplementary Data 3

**Description:** Articles without GWAS summary statistics in GWAS catalog, with updated classification.

**File name:** Supplementary Data 4

**Description:** Results for logistic model of effects on sharing.

**File name:** Supplementary Data 5

**Description:** Results for linear model of effects on citations (measured as  $\log(\text{RCR})$ ).

**File name:** Supplementary Data 6

**Description:** GWAS-publishing journals in GWAS catalog with SJR data (2007 - 2020), including those that shared summary statistics in GWAS catalog and/or elsewhere. Journals selected to analyse their individual effects highlighted in bold.
